# Supplementary material
Source: publisher site journal article supplement (https://www.dovepress.com/article/538345)
Supplement: Supplementary file 1 [file Supplementary%20material.docx]

# Supplementary material

## CT image acquisition

All patients were performed abdominal CECT using a 256-detector row CT scanner (Philips iCT 256 or Revolution CT, GE Healthcare). The patient was placed in the supine position for CT scan from the diaphragmatic vault to the pubic symphysis. The scanning parameters were as follows: tube voltage was 120 kV; tube current was 160-480 mA adjusted by the automatic tube current modulation technique. After scanning, images were reconstructed using the standard reconstruction algorithm. Reconstruction matrix, 512 × 512; reconstruction thickness, 5 mm; reconstruction interval, 5 mm.

Using an Ulrich (Ulrich, Germany) high pressure syringe, the non-ionic contrast agent ioversol (350 mg I/mL) was utilized for the enhanced scanning. The injection flow rate of the contrast agent was 2.5–3.0 ml/s, and the dosage was 450 mg I/kg of body weight. Images of the arterial and portal venous phases were acquired 30, and 60 seconds, respectively, following the contrast agent administration. Images from the portal venous phase were chosen for examination since it was easier to see the necrosis there.

## Image preprocessing and Feature Extraction

Anonymization was applied to the patient picture files during segmentation, and case numbers were assigned at random. The clinical information was hidden from the readers. Image preprocessing and feature extraction were performed by PyRadiomics (version 3.1.0, https://github.com/Radiomics/pyradiomics).

The voxel size of original image was resampled to 3 × 3 × 3 mm3 by nearest neighbor interpolation before features extraction, partially decreasing the diversity of data from different types of scanning equipment. The gray-level histogram's bin width was fixed at 20 in order to compute discretization of image intensities. Further, pixel intensities are normalized using the z-score.

We used 2 classes of image type: the original image type and filtered image types. For original image, the 105 extracted features can be divided into three groups: (1) 14 morphology features, (2) 18 first-order statistics features and (3) 73 texture features, including 22 gray-level co-occurrence matrix (GLCM) features, 14 gray-level dependence matrix (GLDM) features, 16 gray-level run length matrix (GLRLM) features, 16 gray level size zone matrix (GLSZM) features and 5 neighborhood gray-tone difference matrix (NGTDM) features. Filtered image types were obtained by 7 filters including exponential, gradient, laplacian of gaussian, lbp-3D, logarithm, square and square root. For each filtered image, the first order statistical and texture features were extracted (without morphology features). A total of 819 derived features were extracted for each filtered image. A total of 924 features were extracted. The above image preprocessing and radiomics feature extraction are compliant with the image biomarker standardization initiative (IBSI). Details of the features can be found in Supplementary Table 1

Table S1. Radiomic features extracted by PyRadiomics

| Feature classes | Feature names |
| --- | --- |
| First-order Features  (N=18) | 10Percentile |
| 90Percentile |
| Energy |
| Entropy |
| InterquartileRange |
| Kurtosis |
| Maximum |
| Mean |
| MeanAbsoluteDeviation |
| Median |
| Minimum |
| Range |
| RobustMeanAbsoluteDeviation |
| RootMeanSquared |
| Skewness |
| TotalEnergy |
| Uniformity |
| Variance |
| Morphology Features  (N=14) | Elongation |
| Flatness |
| LeastAxisLength |
| MajorAxisLength |
| Maximum2DDiameterColumn |
| Maximum2DDiameterRow |
| Maximum2DDiameterSlice |
| Maximum3DDiameter |
| MeshVolume |
| MinorAxisLength |
| Sphericity |
| SurfaceArea |
| SurfaceVolumeRatio |
| VoxelVolume |
| GLCM Texture Features  (N=22) | Autocorrelation |
| ClusterProminence |
| ClusterShade |
| ClusterTendency |
| Contrast |
| Correlation |
| DifferenceAverage |
| DifferenceEntropy |
| DifferenceVariance |
| Id |
| Idm |
| Idmn |
| Idn |
| Imc1 |
| Imc2 |
| InverseVariance |
| JointAverage |
| JointEnergy |
| JointEntropy |
| MaximumProbability |
| SumEntropy |
| SumSquares |
| GLDM Texture Features  (N=14) | DependenceEntropy |
| DependenceNonUniformity |
| DependenceNonUniformityNormalized |
| DependenceVariance |
| GrayLevelNonUniformity |
| GrayLevelVariance |
| HighGrayLevelEmphasis |
| LargeDependenceEmphasis |
| LargeDependenceHighGrayLevelEmphasis |
| LargeDependenceLowGrayLevelEmphasis |
| LowGrayLevelEmphasis |
| SmallDependenceEmphasis |
| SmallDependenceHighGrayLevelEmphasis |
| SmallDependenceLowGrayLevelEmphasis |
| GLRLM Texture Features  (N=16) | GrayLevelNonUniformity |
| GrayLevelNonUniformityNormalized |
| GrayLevelVariance |
| HighGrayLevelRunEmphasis |
| LongRunEmphasis |
| LongRunHighGrayLevelEmphasis |
| LongRunLowGrayLevelEmphasis |
| LowGrayLevelRunEmphasis |
| RunEntropy |
| RunLengthNonUniformity |
| RunLengthNonUniformityNormalized |
| RunPercentage |
| RunVariance |
| ShortRunEmphasis |
| ShortRunHighGrayLevelEmphasis |
| ShortRunLowGrayLevelEmphasis |
| GLSZM Texture Features  (N=16) | GrayLevelNonUniformity |
| GrayLevelNonUniformityNormalized |
| GrayLevelVariance |
| HighGrayLevelZoneEmphasis |
| LargeAreaEmphasis |
| LargeAreaHighGrayLevelEmphasis |
| LargeAreaLowGrayLevelEmphasis |
| LowGrayLevelZoneEmphasis |
| SizeZoneNonUniformity |
| SizeZoneNonUniformityNormalized |
| SmallAreaEmphasis |
| SmallAreaHighGrayLevelEmphasis |
| SmallAreaLowGrayLevelEmphasis |
| ZoneEntropy |
| ZonePercentage |
| ZoneVariance |
| NGTDM Texture Features  (N=5) | Busyness |
| Coarseness |
| Complexity |
| Contrast |
| Strength |
| Exponential (N=91) |  |
| Gradient (N=91) |  |
| Logarithm (N=91) |  |
| Square (N=91) |  |
| SquareRoot (N=91) |  |
| LBP3D (N=273) | LBP3D-k (N=91) |
| LBP3D-m1 (N=91) |
| LBP3D-m2 (N=91) |
| LoG (N=91) | log-sigma-1.0-mm (N=91) |

## Reproducibility analysis

To examine the reliability of the extracted radiomics features, 30 patients were randomly selected for reproducibility analysis by two abdominal imaging readers. Reader 1 performed the second segmentation and feature extraction after a one-month interval and compared the outcomes with the features the first time obtained by reader 1 for intraobserver agreement analysis. Reader 2 segmented the ROIs and extracted features separately and compared the outcomes with the features the first time obtained by reader 1 for interobserver agreement analysis. Intraclass correlation coefficient (ICC) of each radiomics features was calculated. Radiomics features with either intraobserver or interobserver ICC values < 0.75 (indicating poor reliability) were discarded in subsequent analysis.

There were 106 features with intraobserver ICC values < 0.75 and 93 features with interobserver ICC values < 0.75. A total of 196 radiomics features were eliminated due to low reliability and remaining 728 features with sufficient reproducibility were accepted for the next analysis step.


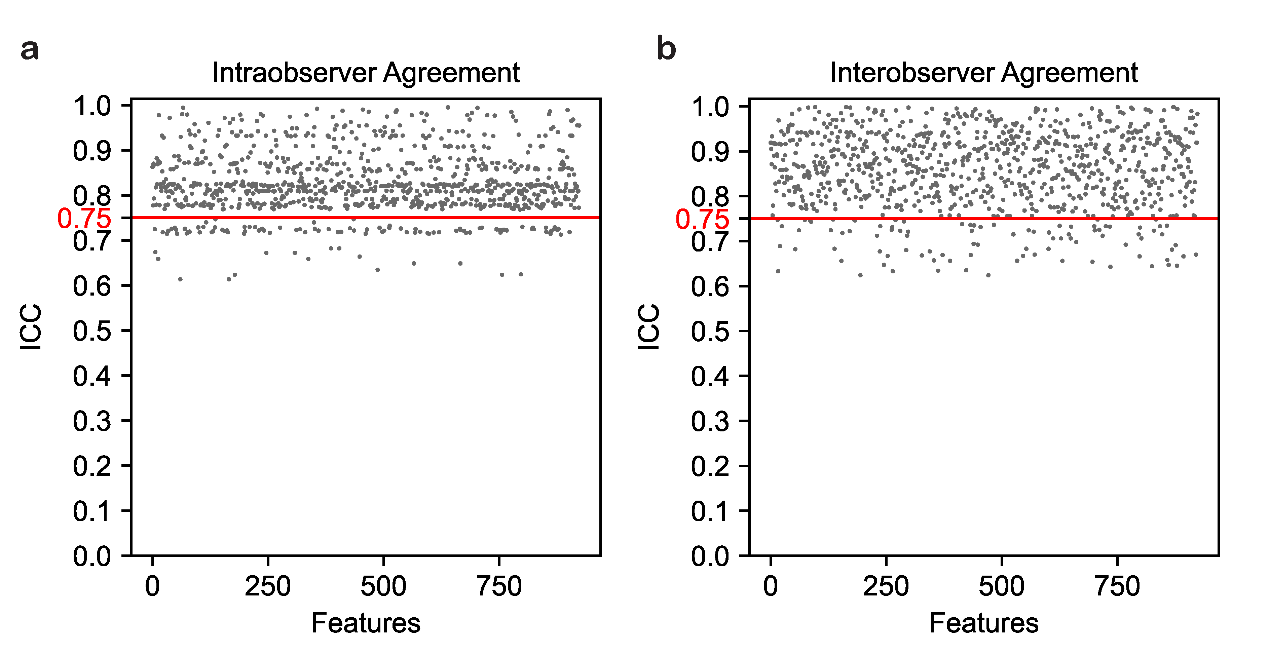


Fig. S1: Evaluation of feature reproducibility based on the interclass correlation coefficient (ICC). (a) intraobserver agreement. (b) interobserver agreement. The horizontal red cutoff line presents the ICC threshold of 0.75. Features with ICC ≥0.75 presents good agreement.

## Rad score formula

The final formula of Rad score is:

rad-score = 0.661740 +0.035302 * squareroot_firstorder_Kurtosis

-0.054993 * lbp_3D_k_glszm_ZoneEntropy

+0.021500 * log_sigma_1_0_mm_3D_glcm_Idn

-0.047828 * lbp_3D_k_gldm_DependenceEntropy

+0.061973 * wavelet_HHH_glcm_Idn

+0.024363 * original_shape_Flatness

+0.031081 * squareroot_glcm_JointAverage
